# Supplementary material for: Development and Validation of PCR Diagnostic Assays for Detection of Avibacterium paragallinarum and Ornithobacterium rhinotracheale
Source: MDPI journal article supplement (doi:10.3390/vetsci11010007), 2023-12-22
Supplement: s1 [file s1]

## Development and validation of PCR diagnostic assays for detection of *Avibacterium paragallinarum* and *Ornithobacterium rhinotracheale*

Supplementary materials:

Table S1: The sample panel of bacterial isolates from the research collection of ARRIAH.

| Organism                                   | Attributes      |         |                    |                    |                              |
|--------------------------------------------|-----------------|---------|--------------------|--------------------|------------------------------|
|                                            | collection date | host    | host disease       | isolation source   | geographic location          |
| <i>A.paragallinarum</i> ser. B 1116        | 2017            | chicken | infectious coryza  | infraorbital sinus | Russia, Republic of Mordovia |
| <i>A.paragallinarum</i> ser. B 1818        | 2017            | chicken | infectious coryza  | infraorbital sinus | Belarus                      |
| <i>A.paragallinarum</i> ser. B 5111        | 2017            | chicken | infectious coryza  | infraorbital sinus | Russia, Orenburg region      |
| <i>A.paragallinarum</i> ser. A 6261        | 2018            | chicken | infectious coryza  | infraorbital sinus | Russia, Vladimir region      |
| <i>A.paragallinarum</i> ser. A, ATCC 29545 | 2019            | chicken | infectious coryza  | infraorbital sinus | Germany                      |
| <i>A.paragallinarum</i> ser. C 1919        | 2018            | chicken | infectious coryza  | infraorbital sinus | Russia, Republic of Mordovia |
| <i>A.paragallinarum</i> Kostroma           | 2018            | chicken | infectious coryza  | infraorbital sinus | Russia, Kostroma region      |
| <i>O.rhinotracheale</i> OR-21              | 2021            | turkey  | ornithobacteriosis | trachea            | Russia, Penza region         |

Table S2: The DNA sample panel from the research collection of the Department of Biotechnology at VGNKI.

| Organism                           | Sample type    | Description                             |
|------------------------------------|----------------|-----------------------------------------|
| Avian Encephalomyelitis            | viral cDNA     | vaccine strain Calnec 1143M             |
| Avian metapneumovirus              | viral cDNA     | vaccine strain TRT 11/94 ser. B         |
| Avian metapneumovirus              | viral cDNA     | vaccine strain Clone K ser. A           |
| Avian metapneumovirus              | viral cDNA     | vaccine strain PV03-B                   |
| Infectious laryngotracheitis virus | viral gDNA     | vaccine strain CHP 50                   |
| Avian poxvirus                     | viral gDNA     | vaccine strain KEM-7                    |
| Chicken anemia virus               | viral gDNA     | vaccine strain Cux-1                    |
| Infectious bronchitis virus        | viral cDNA     | vaccine strain H120 ser Massachusetts   |
| Infectious bursal disease virus    | viral cDNA     | vaccine strain Winterfield 2512         |
| Newcastle virus                    | viral cDNA     | vaccine strain La-Sota                  |
| Egg drop syndrome virus            | viral gDNA     | vaccine strain EDS-76 B-93              |
| Influenza virus type A             | viral cDNA     | vaccine strain Chicken/USSR/315/70      |
| Influenza virus type A H14N6       | viral cDNA     | vaccine strain Mallard/Astrakhan 263/82 |
| Turkey herpes virus                | viral gDNA     | field isolate                           |
| Avian reovirus                     | viral cDNA     | field isolate                           |
| <i>Mycoplasma gallisepticum</i>    | bacterial gDNA | field isolate                           |
| <i>Salmonella</i> Typhimurium      | bacterial gDNA | ATCC 14028                              |
| <i>Staphylococcus aureus</i>       | bacterial gDNA | ATCC 39591                              |
| <i>Streptococcus</i> sp.           | bacterial gDNA | field isolate                           |
| <i>Mannhemia haemolytica</i>       | bacterial gDNA | field isolate                           |

| Organism                         | Sample type          | Description                                           |
|----------------------------------|----------------------|-------------------------------------------------------|
| <i>Arcanobacterium pyogenes</i>  | bacterial gDNA       | ATCC 8164                                             |
| <i>Pasterella multocida</i>      | bacterial gDNA       | field isolate                                         |
| <i>Glaesserella parasuis</i>     | bacterial gDNA       | ATCC 19417                                            |
| <i>Mycobacterium avium</i>       | bacterial gDNA       | field isolate                                         |
| <i>Enterococcus avium</i>        | bacterial gDNA       | ATCC 14025                                            |
| <i>Escherichia coli</i>          | bacterial gDNA       | ATCC 25922                                            |
| <i>Aspergillus brasiliensis</i>  | bacterial gDNA       | ATCC 16404                                            |
| <i>Bordetella bronchiseptica</i> | bacterial gDNA       | ATCC 10580                                            |
| <i>Histophilus somni</i>         | bacterial gDNA       | field isolate                                         |
| <i>Gallus gallus</i>             | gDNA                 | isolated from muscle tissue                           |
| <i>Meleagris gallopavo</i>       | gDNA                 | isolated from muscle tissue                           |
| <i>Anas platyrhynchos</i>        | gDNA                 | isolated from muscle tissue                           |
| <i>Coturnix coturnix</i>         | gDNA                 | isolated from muscle tissue                           |
| <i>Columba livia</i>             | gDNA                 | isolated from muscle tissue                           |
| Internal control                 | phage $\lambda$ gDNA | recombinant phage $\lambda$<br>(GenTerra JSC, Russia) |

#### Nucleotide sequence of internal control

> IC

GTGCGATGGTCCGACTTATTCGTAGAGGGCTAGCTGGGCGTCAGGAATCCCAGGTGGAGGGTGT  
GTCCTGTCGTAGGTAAATAACTGACC

#### PCR optimization

PCR optimization was carried out based on concentrations of oligonucleotides, concentration of magnesium chloride, and temperature parameters. Tenfold serial dilutions of plasmid DNA containing target fragments of the *O. rhinotracheale rnaP* and the *A. paragallinarum lysS* genes or genomic DNA of *A. paragallinarum* and *O. rhinotracheale* were used. Three independent experiments were carried out on different days on different thermal cyclers. In each experiment, two replicates of each tenfold serial dilution of plasmid or genomic DNA were used, and the mean threshold cycle Ct value and standard deviation (SD) were calculated (data not shown).

To optimize the concentration of oligonucleotides, four master mixes were prepared with different concentrations of primers and probes within the working range of 200–1,000 nM (F/R/P): 120/120/60 nM, 240/240/120 nM, 480/480/240 nM, and 960/960/480 nM. Since the sensitivity and efficiency of the PCR assay at different concentrations of oligonucleotides changed insignificantly, the following concentrations were chosen: for the detection of *A. paragallinarum* DNA: 240/ 240/ 120 nM; for the detection of *O. rhinotracheale* DNA: 240/ 240/ 120 nM; and for the internal control: 120/ 120/ 60 nM.

To optimize the concentration of Mg<sup>2+</sup> ions, three working mixtures were prepared within the range of 1–4 mM: 1.5 mM, 2.5 mM, and 3.5 mM. At Mg<sup>2+</sup> concentrations of 2.5 mM and 3.5 mM, the lowest values of Ct and the highest sensitivity were recorded. When the Mg<sup>2+</sup> concentration was reduced to 1.5 mM, PCR assay sensitivity decreased, and in some experiments, PCR efficiency was lower than the established criteria. Thus, the optimal Mg<sup>2+</sup> concentration was found to be 2.5 mM.

To optimize the annealing temperature, studies were carried out at 62 °C, calculated in accordance with the melting temperatures of the primers and probes, as well as at 60 °C and 64 °C, which were 2 °C higher and lower than the calculated melting temperature, respectively. At all tested annealing temperatures, similar values of Ct were observed on both plasmid and genomic DNA. Based on the results obtained, as well as taking into account an increased risk of non-specific annealing with decreasing temperature, the optimal annealing temperature was chosen to be 62 °C.

Moreover, when testing various concentrations of oligonucleotides and magnesium chloride as well as annealing temperatures, the PCR assays for infectious coryza and ornithobacteriosis showed 100% specificity for the panel of samples described above (see Materials and Methods). Only the amplification of the DNA of the target microorganisms was observed.

### DNA extraction

In this work, we tested two different methods for extracting DNA from *A. paragallinarum* and *O. rhinotracheale* across different types of samples (isolates of *A. paragallinarum* and *O. rhinotracheale* and pathological material from chickens, as detailed in Section 2.1). These methods involved precipitation using the AmpliSens® RIBO-prep kit and DNA sorption on silica gel using the AmpliSens® DNA-sorb-B kit (both CRIE, Russia) in accordance with the manufacturer's instructions. According to the results obtained, both tested methods can be used to isolate DNA from samples of pathological tissues from birds and bacterial isolates for the purpose of detecting the DNA of the target pathogen using real-time PCR. However, more optimal indices of threshold cycles (Ct) (and, accordingly, extraction efficiency) were obtained using the precipitation-based method (data not shown).

Table S3: List of whole-genome sequences of *A. paragallinarum* isolates in the NCBI refseq database. The genome used in the NCBI database as a representative genome is highlighted in bold italics.

| No. | Isolate        | Serotype | Assembly               | Level           | Size, (Mb)  | GC, %       | Reference |
|-----|----------------|----------|------------------------|-----------------|-------------|-------------|-----------|
| 1   | JF4211         | A        | GCA_000442905.1        | Contig          | 2.87        | 41.1        | [34]      |
| 2   | NCTC11296      | nd       | GCA_900450705.1        | Contig          | 2.86        | 41.1        | [35]      |
| 3   | NCTC10926      | nd       | GCA_900445345.1        | Contig          | 2.79        | 41.2        |           |
| 4   | 221            | A        | GCA_000348525.1        | Contig          | 2.67        | 41          | [36]      |
| 5   | <b>ESV-135</b> | C-1      | <b>GCA_011765605.1</b> | <b>Complete</b> | <b>2.52</b> | <b>40.9</b> | [37]      |
| 6   | AVPG2015       | nd       | GCA_000969315.2        | Complete        | 2.53        | 40.9        |           |
| 7   | CL             | C        | GCA_000969305.1        | Contig          | 2.41        | 41.3        |           |
| 8   | Modesto        | C        | GCA_004931865.1        | Contig          | 2.35        | 40.9        | [38]      |
| 9   | SCPM-O-B-8407  | nd       | GCA_003204295.1        | Contig          | 2.55        | 40.8        | nd        |
| 10  | SCPM-O-B-8406  | nd       | GCA_003204245.1        | Contig          | 2.56        | 40.8        | nd        |
| 11  | CCUG 12835     | nd       | GCA_002921155.1        | Contig          | 2.46        | 41          | [39]      |
| 12  | AVPG 221       | A        | GCA_004212415.1        | Contig          | 2.66        | 41.1        | nd        |
| 13  | Modesto        | C        | GCA_004212375.1        | Contig          | 2.50        | 40.9        | nd        |
| 14  | SA-3           | C        | GCA_004212355.1        | Contig          | 2.39        | 41          | nd        |
| 15  | 2671           | B        | GCA_004212345.1        | Contig          | 2.34        | 41          | nd        |
| 16  | FARPER-174     | C        | GCA_003864155.1        | Complete        | 2.43        | 40.9        | [40]      |
| 17  | Hp8            | A        | GCA_008633115.1        | Scaffold        | 2.36        | 41          | [41]      |
| 18  | ADL-AP02       | nd       | GCA_012850815.1        | Complete        | 2.42        | 40.9        | [42]      |
| 19  | ADL-AP07       | nd       | GCA_012850655.1        | Complete        | 2.42        | 40.9        |           |
| 20  | ADL-AP15       | nd       | GCA_012850275.1        | Complete        | 2.42        | 40.9        |           |
| 21  | ADL-AP16       | nd       | GCA_012850075.1        | Complete        | 2.42        | 40.9        |           |
| 22  | ADL-AP17       | nd       | GCA_012849875.1        | Complete        | 2.42        | 40.9        |           |
| 23  | ADL-AP10       | nd       | GCA_012850455.1        | Complete        | 2.42        | 40.9        |           |
| 24  | ADL-AP01       | nd       | GCA_012850955.1        | Complete        | 2.42        | 40.9        |           |
| 25  | 72             | C        | GCA_000221945.4        | Contig          | 2.45        | 40.8        | [43]      |
| 26  | APX1-1S-1      | nd       | GCA_015354985.1        | Scaffold        | 2.59        | 40.8        | [44]      |
| 27  | AP1-3S-1       | nd       | GCA_015355095.1        | Scaffold        | 2.59        | 40.8        |           |
| 28  | AP12-4N-1      | nd       | GCA_015354995.1        | Scaffold        | 2.59        | 40.8        |           |
| 29  | APX1-2N-1      | nd       | GCA_015354975.1        | Scaffold        | 2.59        | 40.8        |           |

| No. | Isolate    | Serotype | Assembly        | Level    | Size, (Mb) | GC, % | Reference |
|-----|------------|----------|-----------------|----------|------------|-------|-----------|
| 30  | AP1-1N-1   | nd       | GCA_015355125.1 | Scaffold | 2.59       | 40.8  |           |
| 31  | Z2S-1-2    | nd       | GCA_015354775.1 | Scaffold | 2.59       | 40.8  |           |
| 32  | Z1N-2-2    | nd       | GCA_015354865.1 | Scaffold | 2.59       | 40.8  |           |
| 33  | APX3-2S-2  | nd       | GCA_015354895.1 | Scaffold | 2.59       | 40.8  |           |
| 34  | APX1-1N-2  | nd       | GCA_015354935.1 | Scaffold | 2.59       | 40.8  |           |
| 35  | APX2-2N-2  | nd       | GCA_015354955.1 | Scaffold | 2.59       | 40.8  |           |
| 36  | AP12-5S-1  | nd       | GCA_015355035.1 | Scaffold | 2.59       | 40.8  |           |
| 37  | AP1-2N-1   | nd       | GCA_015355065.1 | Scaffold | 2.59       | 40.8  |           |
| 38  | Y2S-2      | nd       | GCA_015354885.1 | Scaffold | 2.56       | 40.8  |           |
| 39  | AP1-3N-1   | nd       | GCA_015355055.1 | Scaffold | 2.59       | 40.8  |           |
| 40  | Z1N-2-1    | nd       | GCA_015354815.1 | Scaffold | 2.59       | 40.8  |           |
| 41  | Z1N-1-2    | nd       | GCA_015354845.1 | Scaffold | 2.59       | 40.8  |           |
| 42  | p4chr1     | A        | GCA_019822885.1 | Complete | 2.77       | 41    | [45]      |
| 43  | omv-p4chr1 | nd       | GCA_020523945.1 | Contig   | 2.69       | 40.9  | nd        |
| 44  | ZJ-C       | nd       | GCA_022964995.1 | Complete | 2.68       | 40.9  | nd        |
| 45  | M          | nd       | GCA_020892835.1 | Complete | 2.77       | 41    | nd        |

\_\_\_\_\_

[illegible]

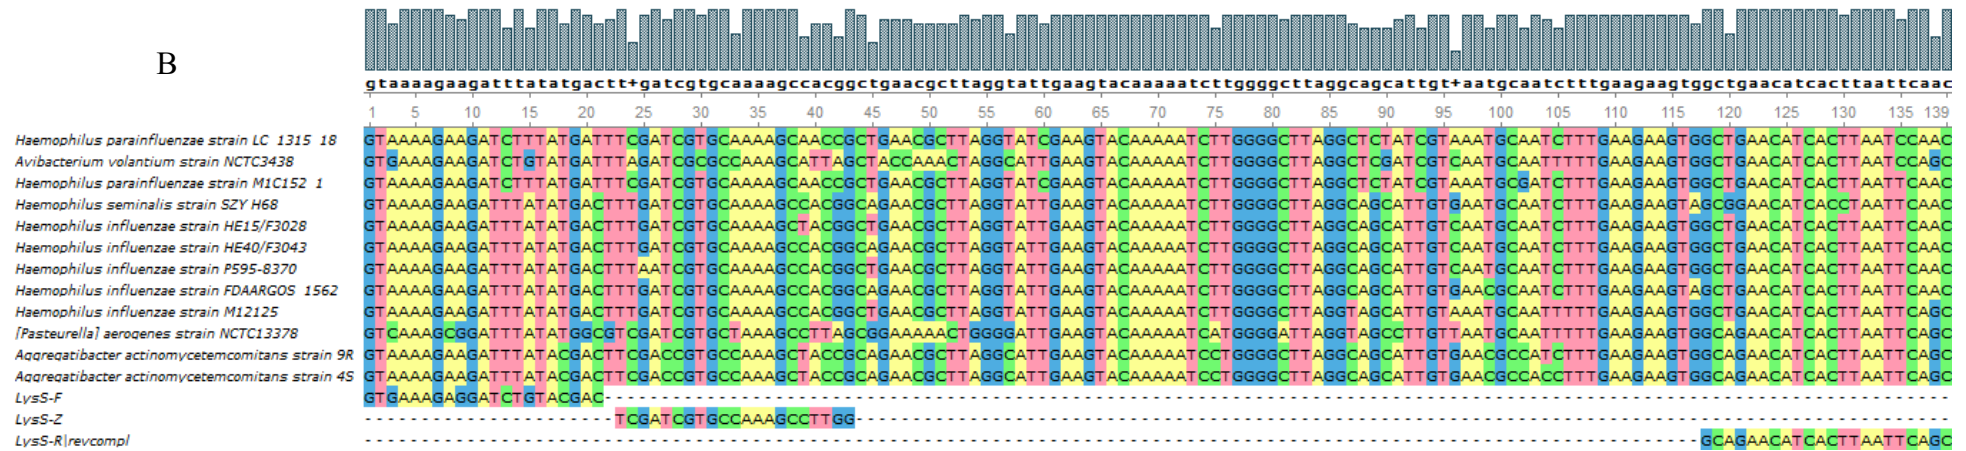

Figure S1: Multiple alignment of *lysS* gene sequences in the region of annealing of primers and probe.

A) *A. paragallinarum*; B) related bacteria.

The reverse primer sequence is given in the reverse-complement orientation.

Table S4: List of whole-genome sequences of *O. rhinotracheale* isolates in the NCBI refseq database. The genome used in the NCBI database as a representative genome is highlighted in bold italics.

| No. | Strain                   | Assembly                      | Level                  | Size, (Mb)         | GC%                 | Reference |
|-----|--------------------------|-------------------------------|------------------------|--------------------|---------------------|-----------|
| 1   | <b><i>ORT-UMN 88</i></b> | <b><i>GCA_000756505.1</i></b> | <b><i>Complete</i></b> | <b><i>2.40</i></b> | <b><i>37.50</i></b> | [46]      |
| 2   | IRI-Sh                   | GCA_024722395.1               | Complete               | 2.40               | 37.50               | nd        |
| 3   | FARPER-174b              | GCA_004088395.1               | Complete               | 2.25               | 38.30               | nd        |
| 4   | OR14                     | GCA_023016705.1               | Contig                 | 2.46               | 37.70               | nd        |
| 5   | 46                       | GCA_023016765.1               | Contig                 | 2.37               | 37.50               | nd        |
| 6   | LMG 18861                | GCA_009659645.1               | Contig                 | 2.35               | 37.30               | [47]      |
| 7   | LMG 18856                | GCA_009659665.1               | Contig                 | 2.42               | 37.10               |           |
| 8   | LMG 19032                | GCA_009659705.1               | Contig                 | 2.41               | 37.10               |           |
| 9   | C183                     | GCA_023016535.1               | Contig                 | 2.42               | 37.40               | nd        |
| 10  | J209                     | GCA_023016785.1               | Contig                 | 2.60               | 37.60               | nd        |
| 11  | ORT3331-2017             | GCA_017084005.1               | Scaffold               | 2.30               | 34.30               | nd        |
| 12  | 97                       | GCA_022832875.1               | Complete               | 2.42               | 37.40               | nd        |
| 13  | A171                     | GCA_022832855.1               | Complete               | 2.41               | 37.50               | nd        |
| 14  | K223                     | GCA_022832975.1               | Complete               | 2.42               | 37.39               | nd        |
| 15  | DSM 15997                | GCA_000265465.1               | Complete               | 2.40               | 37.20               | [48]      |
| 16  | H06-030791               | GCA_000764515.1               | Contig                 | 2.32               | 37.20               | nd        |



A

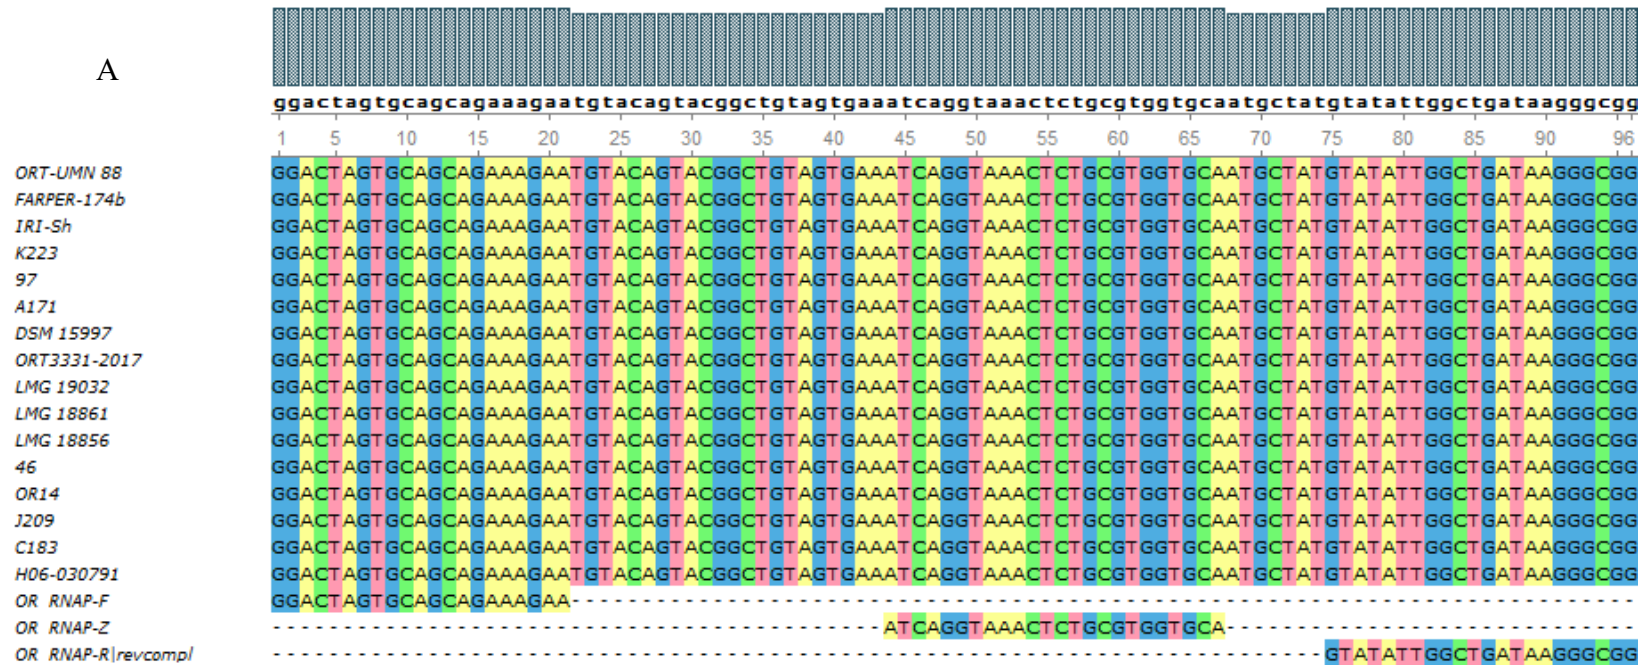

B

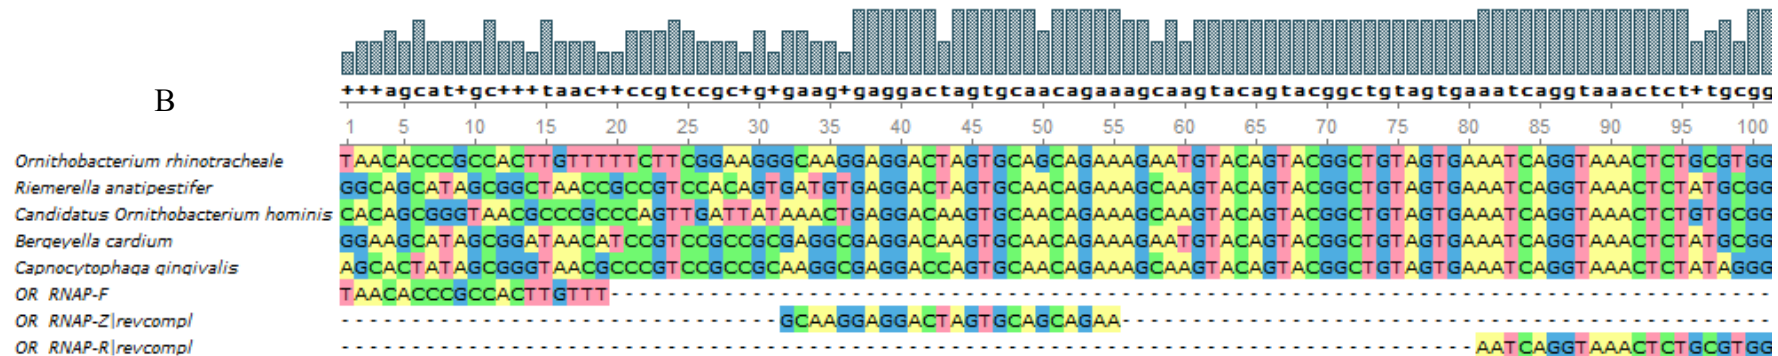

Figure S2: Multiple alignment of *rnaP* gene sequences in the region of annealing of primers and probe.

A) *O. rhinotracheale*; B) some related species.

The sequence of the reverse primer and probe is given in the reverse-complement orientation.

Table S5: Test results for clinical samples of *A. paragallinarum* (A.pg) (fragments of chicken beaks and sinuses).

| Sample No. | Sample type         | Mean Ct $\pm$ SD | CV (Ct), % | <i>A. paragallinarum</i> DNA |
|------------|---------------------|------------------|------------|------------------------------|
| 1          | Known positive A.pg | 18.28 $\pm$ 0.04 | 0.19       | detected                     |
| 2          | Known positive A.pg | 19.49 $\pm$ 0.22 | 1.12       | detected                     |
| 3          | Known positive A.pg | 20.49 $\pm$ 0.05 | 0.24       | detected                     |
| 4          | Known positive A.pg | 19.37 $\pm$ 0.11 | 0.55       | detected                     |
| 5          | Known positive A.pg | 19.29 $\pm$ 0.20 | 1.03       | detected                     |
| 6          | Known positive A.pg | 18.98 $\pm$ 0.02 | 0.11       | detected                     |
| 7          | Known positive A.pg | 19.43 $\pm$ 0.05 | 0.25       | detected                     |
| 8          | Known positive A.pg | 20.48 $\pm$ 0.25 | 1.24       | detected                     |
| 9          | Known positive A.pg | 20.24 $\pm$ 0.11 | 0.56       | detected                     |
| 10         | Known positive A.pg | 19.90 $\pm$ 0.16 | 0.78       | detected                     |
| 11         | Known positive A.pg | 19.61 $\pm$ 0.16 | 0.79       | detected                     |
| 12         | Known positive A.pg | 19.46 $\pm$ 0.14 | 0.73       | detected                     |
| 13         | Known positive A.pg | 20.37 $\pm$ 0.16 | 0.76       | detected                     |
| 14         | Known positive A.pg | 19.71 $\pm$ 0.08 | 0.43       | detected                     |
| 15         | Known positive A.pg | 20.59 $\pm$ 0.15 | 0.72       | detected                     |
| 16         | Known positive A.pg | 20.20 $\pm$ 0.16 | 0.81       | detected                     |
| 17         | Known positive A.pg | 19.46 $\pm$ 0.10 | 0.51       | detected                     |
| 18         | Known positive A.pg | 19.43 $\pm$ 0.16 | 0.84       | detected                     |
| 19         | Known positive A.pg | 20.00 $\pm$ 0.04 | 0.21       | detected                     |
| 20         | Known positive A.pg | 19.49 $\pm$ 0.06 | 0.29       | detected                     |
| 21         | Known positive A.pg | 19.43 $\pm$ 0.09 | 0.47       | detected                     |
| 22         | Known positive A.pg | 19.55 $\pm$ 0.18 | 0.94       | detected                     |
| 23         | Known positive A.pg | 19.50 $\pm$ 0.10 | 0.51       | detected                     |
| 24         | Known positive A.pg | 19.56 $\pm$ 0.08 | 0.40       | detected                     |
| 25         | Known positive A.pg | 20.36 $\pm$ 0.18 | 0.87       | detected                     |
| 26         | Known positive A.pg | 20.78 $\pm$ 0.19 | 0.92       | detected                     |
| 27         | Known positive A.pg | 19.62 $\pm$ 0.11 | 0.58       | detected                     |
| 28         | Known positive A.pg | 19.99 $\pm$ 0.03 | 0.14       | detected                     |
| 29         | Known positive A.pg | 20.79 $\pm$ 0.05 | 0.24       | detected                     |
| 30         | Known positive A.pg | 20.01 $\pm$ 0.11 | 0.53       | detected                     |
| 31         | Known negative A.pg | –                | –          | not detected                 |
| 32         | Known negative A.pg | –                | –          | not detected                 |
| 33         | Known negative A.pg | –                | –          | not detected                 |
| 34         | Known negative A.pg | –                | –          | not detected                 |
| 35         | Known negative A.pg | –                | –          | not detected                 |
| 36         | Known negative A.pg | –                | –          | not detected                 |
| 37         | Known negative A.pg | –                | –          | not detected                 |
| 38         | Known negative A.pg | –                | –          | not detected                 |
| 39         | Known negative A.pg | –                | –          | not detected                 |
| 40         | Known negative A.pg | –                | –          | not detected                 |
| 41         | Known negative A.pg | –                | –          | not detected                 |
| 42         | Known negative A.pg | –                | –          | not detected                 |
| 43         | Known negative A.pg | –                | –          | not detected                 |
| 44         | Known negative A.pg | –                | –          | not detected                 |
| 45         | Known negative A.pg | –                | –          | not detected                 |

| Sample No. | Sample type         | Mean Ct $\pm$ SD | CV (Ct), % | <i>A. paragallinarum</i> DNA |
|------------|---------------------|------------------|------------|------------------------------|
| 46         | Known negative A.pg | –                | –          | not detected                 |
| 47         | Known negative A.pg | –                | –          | not detected                 |
| 48         | Known negative A.pg | –                | –          | not detected                 |
| 49         | Known negative A.pg | –                | –          | not detected                 |
| 50         | Known negative A.pg | –                | –          | not detected                 |
| 51         | Known negative A.pg | –                | –          | not detected                 |
| 52         | Known negative A.pg | –                | –          | not detected                 |
| 53         | Known negative A.pg | –                | –          | not detected                 |
| 54         | Known negative A.pg | –                | –          | not detected                 |
| 55         | Known negative A.pg | –                | –          | not detected                 |
| 56         | Known negative A.pg | –                | –          | not detected                 |
| 57         | Known negative A.pg | –                | –          | not detected                 |
| 58         | Known negative A.pg | –                | –          | not detected                 |
| 59         | Known negative A.pg | –                | –          | not detected                 |
| 60         | Known negative A.pg | –                | –          | not detected                 |

Table S6: Test results for clinical samples of *O. rhinotracheale* (ORT) (chicken tracheal homogenate).

| Sample No. | Sample type        | Mean Ct $\pm$ SD | CV (Ct), % | <i>O.rhinotracheale</i> DNA |
|------------|--------------------|------------------|------------|-----------------------------|
| 1          | Known positive ORT | 18.05 $\pm$ 0.10 | 0.55       | detected                    |
| 2          | Known positive ORT | 17.60 $\pm$ 0.21 | 1.17       | detected                    |
| 3          | Known positive ORT | 18.85 $\pm$ 0.17 | 0.9        | detected                    |
| 4          | Known positive ORT | 17.85 $\pm$ 0.20 | 1.11       | detected                    |
| 5          | Known positive ORT | 17.45 $\pm$ 0.19 | 1.09       | detected                    |
| 6          | Known positive ORT | 17.49 $\pm$ 0.26 | 1.50       | detected                    |
| 7          | Known positive ORT | 17.10 $\pm$ 0.15 | 0.87       | detected                    |
| 8          | Known positive ORT | 16.65 $\pm$ 0.19 | 1.15       | detected                    |
| 9          | Known positive ORT | 16.50 $\pm$ 0.13 | 0.81       | detected                    |
| 10         | Known positive ORT | 16.28 $\pm$ 0.21 | 1.26       | detected                    |
| 11         | Known positive ORT | 18.49 $\pm$ 0.06 | 0.31       | detected                    |
| 12         | Known positive ORT | 17.51 $\pm$ 0.12 | 0.69       | detected                    |
| 13         | Known positive ORT | 17.63 $\pm$ 0.30 | 1.68       | detected                    |
| 14         | Known positive ORT | 18.18 $\pm$ 0.16 | 0.89       | detected                    |
| 15         | Known positive ORT | 17.78 $\pm$ 0.25 | 1.43       | detected                    |
| 16         | Known positive ORT | 17.59 $\pm$ 0.23 | 1.29       | detected                    |
| 17         | Known positive ORT | 16.54 $\pm$ 0.13 | 0.77       | detected                    |
| 18         | Known positive ORT | 17.71 $\pm$ 0.11 | 0.6        | detected                    |
| 19         | Known positive ORT | 17.56 $\pm$ 0.16 | 0.89       | detected                    |
| 20         | Known positive ORT | 17.60 $\pm$ 0.23 | 1.29       | detected                    |
| 21         | Known positive ORT | 18.57 $\pm$ 0.36 | 1.94       | detected                    |
| 22         | Known positive ORT | 18.57 $\pm$ 0.16 | 0.84       | detected                    |
| 23         | Known positive ORT | 18.66 $\pm$ 0.12 | 0.64       | detected                    |
| 24         | Known positive ORT | 19.26 $\pm$ 0.16 | 0.84       | detected                    |
| 25         | Known positive ORT | 18.46 $\pm$ 0.07 | 0.38       | detected                    |
| 26         | Known positive ORT | 18.58 $\pm$ 0.50 | 2.70       | detected                    |
| 27         | Known positive ORT | 17.63 $\pm$ 0.26 | 1.48       | detected                    |

| Sample No. | Sample type        | Mean Ct $\pm$ SD | CV (Ct), % | <i>O.rhinotracheale</i> DNA |
|------------|--------------------|------------------|------------|-----------------------------|
| 28         | Known positive ORT | 17.60 $\pm$ 0.19 | 1.09       | detected                    |
| 29         | Known positive ORT | 16.57 $\pm$ 0.17 | 1.02       | detected                    |
| 30         | Known positive ORT | 16.42 $\pm$ 0.30 | 1.81       | detected                    |
| 31         | Known negative ORT | –                | –          | not detected                |
| 32         | Known negative ORT | –                | –          | not detected                |
| 33         | Known negative ORT | –                | –          | not detected                |
| 34         | Known negative ORT | –                | –          | not detected                |
| 35         | Known negative ORT | –                | –          | not detected                |
| 36         | Known negative ORT | –                | –          | not detected                |
| 37         | Known negative ORT | –                | –          | not detected                |
| 38         | Known negative ORT | 36.12            | –          | not detected <sup>1</sup>   |
| 39         | Known negative ORT | –                | –          | not detected                |
| 40         | Known negative ORT | 35.24 $\pm$ 0.49 | –          | not detected <sup>2</sup>   |
| 41         | Known negative ORT | –                | –          | not detected                |
| 42         | Known negative ORT | –                | –          | not detected                |
| 43         | Known negative ORT | –                | –          | not detected                |
| 44         | Known negative ORT | –                | –          | not detected                |
| 45         | Known negative ORT | –                | –          | not detected                |
| 46         | Known negative ORT | –                | –          | not detected                |
| 47         | Known negative ORT | 35.18            | –          | not detected <sup>1</sup>   |
| 48         | Known negative ORT | –                | –          | not detected                |
| 49         | Known negative ORT | –                | –          | not detected                |
| 50         | Known negative ORT | –                | –          | not detected                |
| 51         | Known negative ORT | –                | –          | not detected                |
| 52         | Known negative ORT | –                | –          | not detected                |
| 53         | Known negative ORT | –                | –          | not detected                |
| 54         | Known negative ORT | –                | –          | not detected                |
| 55         | Known negative ORT | 35.37            | –          | not detected <sup>1</sup>   |
| 56         | Known negative ORT | –                | –          | not detected                |
| 57         | Known negative ORT | –                | –          | not detected                |
| 58         | Known negative ORT | –                | –          | not detected                |
| 59         | Known negative ORT | –                | –          | not detected                |
| 60         | Known negative ORT | 35.43            | –          | not detected <sup>1</sup>   |

1 – the Ct is available in one replicate only.

2 – the Ct is above the cut-off limit equal to 32.
